# Supplementary material
Source: ML conference proceedings conference paper supplement (https://openaccess.thecvf.com/content/ICCV2023/html/Li_StegaNeRF_Embedding_Invisible_ICCV_2023_paper.html)
Supplement: Supplementary file 2 [file Li_StegaNeRF_Embedding_Invisible_ICCV_2023_supplemental.zip]

Archive with 2 entries (2 files):
- 05195-supp.pdf
- 05195-supp-video.mp4
